# Supplementary material for: Non-trivial solution chemistry between amido-pyridylcalix[4]arenes and some metal salts
Source: Royal Society of Chemistry journal article supplement (doi:10.1039/c0dt00976h), 2010-01-01
Supplement: c0dt00976h.pdf [file c0dt00976h.pdf]

## Supplementary Information

John Colleran, Bernadette S. Creaven, Denis F. Donlon and John McGinley

### Table of Contents

|                                                                                                        |    |
|--------------------------------------------------------------------------------------------------------|----|
| <sup>1</sup> H NMR of mercury complexes of <b>3</b> .                                                  | 2  |
| <sup>1</sup> H NMR titrations of <b>3</b> and mercury(II) perchlorate in deuterated DMSO.              | 3  |
| <sup>1</sup> H NMR titrations of <b>3</b> and mercury(II) chloride in deuterated DMSO.                 | 4  |
| <sup>1</sup> H NMR titrations of <b>3</b> and mercury(II) thiocyanate in deuterated DMSO.              | 4  |
| Variable temperature <sup>1</sup> H NMR spectroscopy of <b>3</b> and mercury(II) perchlorate at 30 °C. | 5  |
| Variable temperature <sup>1</sup> H NMR spectroscopy of <b>3</b> and mercury(II) perchlorate at 40 °C. | 6  |
| Variable temperature <sup>1</sup> H NMR spectroscopy of <b>3</b> and mercury(II) perchlorate at 50 °C. | 7  |
| Variable temperature <sup>1</sup> H NMR spectroscopy of <b>3</b> and mercury(II) perchlorate at 60 °C. | 8  |
| Variable temperature <sup>1</sup> H NMR spectroscopy of <b>3</b> and mercury(II) perchlorate at 70 °C. | 9  |
| Variable temperature <sup>1</sup> H NMR spectroscopy of <b>3</b> and mercury(II) perchlorate at 80 °C. | 10 |
| Variable temperature <sup>1</sup> H NMR spectroscopy of <b>3</b> and mercury(II) perchlorate at 90 °C. | 11 |

| Sample $\delta_{\text{H}}$ / ppm                       | Ar-H                                                                                                          | OH   | Ar-CH <sub>2</sub> -Ar      | <i>tert</i> -Bu | OCH <sub>2</sub> | NH   | NCH <sub>2</sub>     | Py-H                                                                        |
|--------------------------------------------------------|---------------------------------------------------------------------------------------------------------------|------|-----------------------------|-----------------|------------------|------|----------------------|-----------------------------------------------------------------------------|
| <b>3<sup>a</sup></b>                                   | 7.06, 6.82                                                                                                    | 7.03 | 4.03, 3.34 ( <i>J</i> 13.3) | 1.27, 0.97      | 4.51             | 9.07 | 4.64 ( <i>J</i> 5.2) | 8.35 ( <i>J</i> 4.9), 7.56 ( <i>J</i> 7.7), 7.29 ( <i>J</i> 7.7), 7.13 (br) |
| <b>3 + HgCl<sub>2</sub><sup>a</sup></b>                | 7.02, 6.82                                                                                                    | 7.23 | 3.95, 3.33 ( <i>J</i> 13.3) | 1.27, 0.97      | 4.54             | 9.23 | 4.75 ( <i>J</i> 5.6) | 8.48 ( <i>J</i> 4.8), 7.62 ( <i>J</i> 7.7), 7.33 ( <i>J</i> 4.9), 7.25 (br) |
| <b>3 + Hg(ClO<sub>4</sub>)<sub>2</sub><sup>a</sup></b> | Could not be carried out due to lack of solubility of Hg(ClO <sub>4</sub> ) <sub>2</sub> in CDCl <sub>3</sub> |      |                             |                 |                  |      |                      |                                                                             |
|                                                        |                                                                                                               |      |                             |                 |                  |      |                      |                                                                             |
| <b>3<sup>b</sup></b>                                   | 7.17                                                                                                          | 8.47 | 4.21, 3.47 ( <i>J</i> 12.8) | 1.19, 1.14      | 4.54             | 9.06 | 4.55 (br)            | 8.47 (br), 7.73 ( <i>J</i> 7.8), 7.38 ( <i>J</i> 7.8), 7.23 (br)            |
| <b>3 + HgCl<sub>2</sub><sup>b</sup></b>                | 7.16                                                                                                          | 8.45 | 4.21, 3.46 ( <i>J</i> 12.8) | 1.19, 1.13      | 4.54             | 9.05 | 4.55 (br)            | 8.46 (br), 7.73 ( <i>J</i> 7.8), 7.38 ( <i>J</i> 7.9), 7.23 (br)            |
| <b>3 + Hg(ClO<sub>4</sub>)<sub>2</sub><sup>b</sup></b> | 7.15                                                                                                          | 8.36 | 4.18, 3.46 ( <i>J</i> 12.8) | 1.18, 1.12      | 4.56             | 9.24 | 4.72 (br)            | 8.55 (br), 7.92 (br), 7.54 (br), 7.42 (br)                                  |
|                                                        |                                                                                                               |      |                             |                 |                  |      |                      |                                                                             |
| <b>3<sup>c</sup></b>                                   | 7.23, 7.19                                                                                                    | 8.05 | 4.15, 3.46 ( <i>J</i> 13.0) | 1.22, 1.14      | 4.55             | 9.06 | 4.68 ( <i>J</i> 5.6) | 8.44 ( <i>J</i> 4.8), 7.68 ( <i>J</i> 7.7), 7.40 ( <i>J</i> 7.7), 7.17 (br) |
| <b>3 + HgCl<sub>2</sub><sup>c</sup></b>                | 7.23, 7.19                                                                                                    | 7.97 | 4.14, 3.44 ( <i>J</i> 13.0) | 1.21, 1.14      | 4.53             | 8.76 | 4.83 ( <i>J</i> 5.7) | 8.60 (br), 7.79 ( <i>J</i> 7.8), 7.52 ( <i>J</i> 7.8), 7.33 (br)            |
| <b>3 + Hg(ClO<sub>4</sub>)<sub>2</sub><sup>c</sup></b> | 7.21, 7.15                                                                                                    | 8.04 | 4.09, 3.38 ( <i>J</i> 13.0) | 1.19, 1.13      | 4.65             | 9.03 | 5.16 ( <i>J</i> 5.9) | 8.82 ( <i>J</i> 5.5), 8.33 ( <i>J</i> 7.5), 7.87 ( <i>J</i> 7.5), 7.86 (br) |

<sup>1</sup>H NMR of mercury complexes of **3**. (a = CDCl<sub>3</sub>, b = *d*<sub>6</sub>DMSO, c = CD<sub>3</sub>CN)

| Sample $\delta_{\text{H}}$ / ppm                        | Ar- <u>H</u> | OH   | Ar- <u>CH</u> <sub>2</sub> -Ar | <i>tert</i> -Bu | O <u>CH</u> <sub>2</sub> | N <u>H</u> | N <u>CH</u> <sub>2</sub> | Py- <u>H</u>           |
|---------------------------------------------------------|--------------|------|--------------------------------|-----------------|--------------------------|------------|--------------------------|------------------------|
| <b>3</b>                                                | 7.17         | 8.47 | 4.21, 3.47                     | 1.19, 1.14      | 4.54                     | 9.06       | 4.55                     | 8.47, 7.73, 7.38, 7.23 |
| <b>3</b> + Hg(ClO <sub>4</sub> ) <sub>2</sub> (0.2 Eq)  | 7.16         | 8.45 | 4.20, 3.46                     | 1.18, 1.13      | 4.54                     | 9.07       | 4.56                     | 8.47, 7.76, 7.40, 7.25 |
| <b>3</b> + Hg(ClO <sub>4</sub> ) <sub>2</sub> (0.4 Eq)  | 7.16         | 8.42 | 4.20, 3.46                     | 1.18, 1.13      | 4.55                     | 9.12       | 4.60                     | 8.49, 7.79, 7.43, 7.29 |
| <b>3</b> + Hg(ClO <sub>4</sub> ) <sub>2</sub> (0.6 Eq)  | 7.16         | 8.40 | 4.19, 3.46                     | 1.18, 1.12      | 4.55                     | 9.16       | 4.64                     | 8.51, 7.83, 7.48, 7.33 |
| <b>3</b> + Hg(ClO <sub>4</sub> ) <sub>2</sub> (0.8 Eq)  | 7.15         | 8.38 | 4.18, 3.46                     | 1.18, 1.12      | 4.55                     | 9.20       | 4.64                     | 8.53, 7.87, 7.50, 7.39 |
| <b>3</b> + Hg(ClO <sub>4</sub> ) <sub>2</sub> (1.0 Eq)  | 7.15         | 8.36 | 4.18, 3.46                     | 1.18, 1.12      | 4.56                     | 9.24       | 4.72                     | 8.55, 7.92, 7.54, 7.42 |
| <b>3</b> + Hg(ClO <sub>4</sub> ) <sub>2</sub> (2.0 Eq)  | 7.15         | 8.31 | 4.15, N/O                      | 1.17, 1.11      | 4.58                     | 9.38       | 4.86                     | 8.61, 8.05, 7.62, 7.59 |
| <b>3</b> + Hg(ClO <sub>4</sub> ) <sub>2</sub> (4.0 Eq)  | 7.14         | 8.25 | 4.13, N/O                      | 1.17, 1.11      | 4.60                     | 9.54       | 4.99                     | 8.68, 8.21, 7.79, 7.72 |
| <b>3</b> + Hg(ClO <sub>4</sub> ) <sub>2</sub> (6.0 Eq)  | 7.14         | 8.22 | 4.11, N/O                      | 1.16, 1.11      | 4.60                     | 9.59       | 5.02                     | 8.70, 8.26, 7.84, 7.77 |
| <b>3</b> + Hg(ClO <sub>4</sub> ) <sub>2</sub> (8.0 Eq)  | 7.13         | 8.20 | 4.10, N/O                      | 1.16, 1.11      | 4.61                     | 9.64       | 5.05                     | 8.71, 8.27, 7.87, 7.79 |
| <b>3</b> + Hg(ClO <sub>4</sub> ) <sub>2</sub> (10.0 Eq) | 7.13         | 8.18 | 4.10, N/O                      | 1.16, 1.10      | 4.61                     | 9.65       | 5.06                     | 8.72, 8.28, 7.89, 7.82 |

– <sup>1</sup>H NMR titrations of **3** and mercury(II) perchlorate in deuterated DMSO. (N/O:Peak masked by DMSO peak)

| Sample $\delta_{\text{H}}$ / ppm       | Ar- <u>H</u> | OH   | Ar- <u>CH</u> <sub>2</sub> -Ar | <i>tert</i> -Bu | O <u>CH</u> <sub>2</sub> | N <u>H</u> | N <u>CH</u> <sub>2</sub> | Py- <u>H</u>           |
|----------------------------------------|--------------|------|--------------------------------|-----------------|--------------------------|------------|--------------------------|------------------------|
| <b>3</b>                               | 7.17         | 8.47 | 4.21, 3.47                     | 1.19, 1.14      | 4.54                     | 9.06       | 4.55                     | 8.47, 7.73, 7.38, 7.23 |
| <b>3</b> + HgCl <sub>2</sub> (0.2 Eq)  | 7.16         | 8.45 | 4.21, 3.46                     | 1.18, 1.13      | 4.54                     | 9.05       | 4.55                     | 8.46, 7.73, 7.38, 7.22 |
| <b>3</b> + HgCl <sub>2</sub> (1.0 Eq)  | 7.16         | 8.45 | 4.21, 3.46                     | 1.19, 1.13      | 4.54                     | 9.05       | 4.55                     | 8.46, 7.73, 7.38, 7.23 |
| <b>3</b> + HgCl <sub>2</sub> (10.0 Eq) | 7.16         | 8.45 | 4.21, 3.46                     | 1.19, 1.13      | 4.54                     | 9.06       | 4.55                     | 8.46, 7.73, 7.38, 7.23 |

<sup>1</sup>H NMR titrations of **3** and mercury(II) chloride in deuterated DMSO. No shifts in peak values were observed throughout these titrations, only the data for 0.2, 1.0 and 10.0 shown.

| Sample $\delta_{\text{H}}$ / ppm          | Ar- <u>H</u> | OH   | Ar- <u>CH</u> <sub>2</sub> -Ar | <i>tert</i> -Bu | O <u>CH</u> <sub>2</sub> | N <u>H</u> | N <u>CH</u> <sub>2</sub> | Py- <u>H</u>           |
|-------------------------------------------|--------------|------|--------------------------------|-----------------|--------------------------|------------|--------------------------|------------------------|
| <b>3</b>                                  | 7.17         | 8.47 | 4.21, 3.47                     | 1.19, 1.14      | 4.54                     | 9.06       | 4.55                     | 8.47, 7.73, 7.38, 7.23 |
| <b>3</b> + Hg(SCN) <sub>2</sub> (0.2 Eq)  | 7.16         | 8.45 | 4.21, 3.46                     | 1.18, 1.13      | 4.54                     | 9.05       | 4.55                     | 8.46, 7.73, 7.38, 7.23 |
| <b>3</b> + Hg(SCN) <sub>2</sub> (1.0 Eq)  | 7.16         | 8.45 | 4.21, 3.46                     | 1.18, 1.13      | 4.54                     | 9.05       | 4.55                     | 8.46, 7.73, 7.37, 7.22 |
| <b>3</b> + Hg(SCN) <sub>2</sub> (10.0 Eq) | 7.16         | 8.45 | 4.20, 3.46                     | 1.18, 1.13      | 4.53                     | 9.05       | 4.55                     | 8.46, 7.73, 7.37, 7.22 |

<sup>1</sup>H NMR titrations of **3** and mercury(II) thiocyanate in deuterated DMSO. No shifts in peak values were observed throughout these titrations, only the data for 0.2, 1.0 and 10.0 shown.

| Sample $\delta_{\text{H}}$ / ppm (30 °C)                | Ar- <u>H</u> | OH   | Ar- <u>CH</u> <sub>2</sub> -Ar | <i>tert</i> -Bu | O <u>CH</u> <sub>2</sub> | N <u>H</u> | N <u>CH</u> <sub>2</sub> | Py- <u>H</u>           |
|---------------------------------------------------------|--------------|------|--------------------------------|-----------------|--------------------------|------------|--------------------------|------------------------|
| <b>3</b>                                                | 7.17         | 8.44 | 4.22, 3.47                     | 1.20, 1.14      | 4.55                     | 9.05       | 4.56                     | 8.47, 7.74, 7.39, 7.24 |
| <b>3</b> + Hg(ClO <sub>4</sub> ) <sub>2</sub> (0.5 Eq)  | 7.17         | 8.44 | 4.22, 3.47                     | 1.20, 1.14      | 4.55                     | 9.06       | 4.56                     | 8.48, 7.75, 7.40, 7.25 |
| <b>3</b> + Hg(ClO <sub>4</sub> ) <sub>2</sub> (1.0 Eq)  | 7.17         | 8.41 | 4.21, 3.47                     | 1.20, 1.14      | 4.56                     | 9.12       | 4.63                     | 8.51, 7.81, 7.46, 7.31 |
| <b>3</b> + Hg(ClO <sub>4</sub> ) <sub>2</sub> (1.5 Eq)  | 7.16         | 8.38 | 4.20, 3.47                     | 1.20, 1.14      | 4.57                     | 9.18       | 4.68                     | 8.54, 7.87, 7.51, 7.38 |
| <b>3</b> + Hg(ClO <sub>4</sub> ) <sub>2</sub> (2.0 Eq)  | 7.16         | 8.37 | 4.19, 3.47                     | 1.20, 1.14      | 4.57                     | 9.23       | 4.72                     | 8.56, 7.92, 7.55, 7.42 |
| <b>3</b> + Hg(ClO <sub>4</sub> ) <sub>2</sub> (5.0 Eq)  | 7.15         | 8.28 | 4.17, 3.47                     | 1.20, 1.14      | 4.60                     | 9.41       | 4.89                     | 8.63, 8.07, 7.70, 7.58 |
| <b>3</b> + Hg(ClO <sub>4</sub> ) <sub>2</sub> (10.0 Eq) | 7.15         | 8.23 | 4.14, 3.47                     | 1.19, 1.13      | 4.62                     | 9.57       | 5.01                     | 8.70, 8.23, 7.84, 7.75 |
| <b>3</b> + Hg(ClO <sub>4</sub> ) <sub>2</sub> (15.0 Eq) | 7.15         | 8.21 | 4.13, 3.47                     | 1.19, 1.12      | 4.62                     | 9.63       | 5.06                     | 8.73, 8.27, 7.87, 7.58 |

– Variable temperature <sup>1</sup>H NMR spectroscopy of **3** and mercury(II) perchlorate at 30 °C.

| Sample $\delta_{\text{H}}$ / ppm (40 °C)                | Ar- <u>H</u> | OH   | Ar- <u>CH</u> <sub>2</sub> -Ar | <i>tert</i> -Bu | O <u>CH</u> <sub>2</sub> | N <u>H</u> | N <u>CH</u> <sub>2</sub> | Py- <u>H</u>           |
|---------------------------------------------------------|--------------|------|--------------------------------|-----------------|--------------------------|------------|--------------------------|------------------------|
| <b>3</b>                                                | 7.15, 7.14   | 8.36 | 4.22, 3.47                     | 1.20, 1.14      | 4.55                     | 8.99       | 4.56                     | 8.45, 7.71, 7.37, 7.21 |
| <b>3</b> + Hg(ClO <sub>4</sub> ) <sub>2</sub> (0.5 Eq)  | 7.16, 7.15   | 8.38 | 4.23, 3.47                     | 1.21, 1.14      | 4.55                     | 9.02       | 4.57                     | 8.47, 7.74, 7.39, 7.24 |
| <b>3</b> + Hg(ClO <sub>4</sub> ) <sub>2</sub> (1.0 Eq)  | 7.17, 7.15   | 8.35 | 4.22, 3.47                     | 1.20, 1.13      | 4.56                     | 9.08       | 4.62                     | 8.50, 7.80, 7.45, 7.30 |
| <b>3</b> + Hg(ClO <sub>4</sub> ) <sub>2</sub> (1.5 Eq)  | 7.16, 7.15   | 8.33 | 4.20, 3.47                     | 1.20, 1.13      | 4.56                     | 9.13       | 4.66                     | 8.54, 7.84, 7.49, 7.35 |
| <b>3</b> + Hg(ClO <sub>4</sub> ) <sub>2</sub> (2.0 Eq)  | 7.16, 7.15   | 8.31 | 4.20, 3.47                     | 1.20, 1.13      | 4.57                     | 9.16       | 4.69                     | 8.54, 7.87, 7.52, 7.38 |
| <b>3</b> + Hg(ClO <sub>4</sub> ) <sub>2</sub> (5.0 Eq)  | 7.15, 7.15   | 8.25 | 4.18, 3.46                     | 1.20, 1.13      | 4.59                     | 9.31       | 4.82                     | 8.61, 8.02, 7.65, 7.54 |
| <b>3</b> + Hg(ClO <sub>4</sub> ) <sub>2</sub> (10.0 Eq) | 7.15, 7.14   | 8.19 | 4.15, 3.46                     | 1.19, 1.12      | 4.61                     | 9.44       | 5.01                     | 8.67, 8.13, 7.75, 7.67 |
| <b>3</b> + Hg(ClO <sub>4</sub> ) <sub>2</sub> (15.0 Eq) | 7.15, 7.14   | 8.17 | 4.14, 3.46                     | 1.19, 1.12      | 4.62                     | 9.51       | 5.01                     | 8.70, 8.15, 7.81, 7.73 |

.. Variable temperature <sup>1</sup>H NMR spectroscopy of **3** and mercury(II) perchlorate at 40 °C.

| Sample $\delta_{\text{H}}$ / ppm (50 °C)                | Ar- <u>H</u> | OH   | Ar- <u>CH</u> <sub>2</sub> -Ar | <i>tert</i> -Bu | O <u>CH</u> <sub>2</sub> | N <u>H</u> | N <u>CH</u> <sub>2</sub> | Py- <u>H</u>           |
|---------------------------------------------------------|--------------|------|--------------------------------|-----------------|--------------------------|------------|--------------------------|------------------------|
| <b>3</b>                                                | 7.16         | 8.46 | 4.22, 3.47                     | 1.20, 1.14      | 4.55                     | 9.07       | 4.56                     | 8.47, 7.73, 7.38, 7.23 |
| <b>3</b> + Hg(ClO <sub>4</sub> ) <sub>2</sub> (0.5 Eq)  | 7.16, 7.14   | 8.30 | 4.23, 3.46                     | 1.21, 1.13      | 4.55                     | 8.98       | 4.57                     | 8.47, 7.73, 7.39, 7.23 |
| <b>3</b> + Hg(ClO <sub>4</sub> ) <sub>2</sub> (1.0 Eq)  | 7.16, 7.14   | 8.28 | 4.23, 3.46                     | 1.21, 1.13      | 4.56                     | 9.02       | 4.61                     | 8.49, 7.77, 7.43, 7.28 |
| <b>3</b> + Hg(ClO <sub>4</sub> ) <sub>2</sub> (1.5 Eq)  | 7.15, 7.13   | 8.26 | 4.22, 3.46                     | 1.21, 1.13      | 4.56                     | 9.06       | 4.65                     | 8.51, 7.81, 7.47, 7.32 |
| <b>3</b> + Hg(ClO <sub>4</sub> ) <sub>2</sub> (2.0 Eq)  | 7.15, 7.13   | 8.25 | 4.21, 3.46                     | 1.21, 1.13      | 4.56                     | 9.09       | 4.67                     | 8.52, 7.84, 7.49, 7.35 |
| <b>3</b> + Hg(ClO <sub>4</sub> ) <sub>2</sub> (5.0 Eq)  | 7.15, 7.15   | 8.20 | 4.19, 3.46                     | 1.21, 1.12      | 4.58                     | 9.23       | 4.78                     | 8.58, 7.96, 7.60, 7.48 |
| <b>3</b> + Hg(ClO <sub>4</sub> ) <sub>2</sub> (10.0 Eq) | 7.14, 7.12   | 8.14 | 4.17, 3.46                     | 1.21, 1.12      | 4.59                     | 9.34       | 4.87                     | 8.64, 8.06, 7.70, 7.58 |
| <b>3</b> + Hg(ClO <sub>4</sub> ) <sub>2</sub> (15.0 Eq) | 7.14, 7.12   | 8.17 | 4.16, 3.46                     | 1.20, 1.12      | 4.61                     | 9.39       | 4.91                     | 8.66, 8.12, 7.74, 7.64 |

– Variable temperature <sup>1</sup>H NMR spectroscopy of **3** and mercury(II) perchlorate at 50 °C.

| Sample $\delta_{\text{H}}$ / ppm (60 °C)                | Ar- <u>H</u> | OH   | Ar- <u>CH</u> <sub>2</sub> -Ar | <i>tert</i> -Bu | O <u>CH</u> <sub>2</sub> | N <u>H</u> | N <u>CH</u> <sub>2</sub> | Py- <u>H</u>                          |
|---------------------------------------------------------|--------------|------|--------------------------------|-----------------|--------------------------|------------|--------------------------|---------------------------------------|
| <b>3</b>                                                | 7.13, 7.09   | 8.18 | 4.22, 3.43 ( <i>J</i> 13.0)    | 1.20, 1.10      | 4.53                     | 8.91       | 4.55 ( <i>J</i> 6.0)     | 8.44, 7.69( <i>J</i> 7.8), 7.36, 7.20 |
| <b>3</b> + Hg(ClO <sub>4</sub> ) <sub>2</sub> (0.5 Eq)  | 7.16, 7.12   | 8.21 | 4.24, 3.45                     | 1.22, 1.12      | 4.55                     | 8.93       | 4.57                     | 8.47, 7.72, 7.39, 7.23                |
| <b>3</b> + Hg(ClO <sub>4</sub> ) <sub>2</sub> (1.0 Eq)  | 7.15, 7.11   | 8.19 | 4.23, 3.45                     | 1.22, 1.12      | 4.55                     | 8.97       | 4.60                     | 8.48, 7.76, 7.42, 7.26                |
| <b>3</b> + Hg(ClO <sub>4</sub> ) <sub>2</sub> (1.5 Eq)  | 7.15, 7.11   | 8.17 | 4.23, 3.45                     | 1.22, 1.12      | 4.56                     | 9.00       | 4.63                     | 8.50, 7.78, 7.45, 7.30                |
| <b>3</b> + Hg(ClO <sub>4</sub> ) <sub>2</sub> (2.0 Eq)  | 7.15, 7.11   | 8.17 | 4.22, 3.45                     | 1.22, 1.12      | 4.56                     | 9.02       | 4.65                     | 8.51, 7.80, 7.47, 7.32                |
| <b>3</b> + Hg(ClO <sub>4</sub> ) <sub>2</sub> (5.0 Eq)  | 7.15, 7.11   | 8.12 | 4.20, 3.45                     | 1.22, 1.12      | 4.57                     | 9.13       | 4.73                     | 8.56, 7.90, 7.55, 7.42                |
| <b>3</b> + Hg(ClO <sub>4</sub> ) <sub>2</sub> (10.0 Eq) | 7.14, 7.10   | 8.07 | 4.18, 3.45                     | 1.22, 1.11      | 4.59                     | 9.24       | 4.83                     | 8.61, 8.01, 7.64, 7.54                |
| <b>3</b> + Hg(ClO <sub>4</sub> ) <sub>2</sub> (15.0 Eq) | 7.14, 7.10   | 8.06 | 4.17, 3.45                     | 1.21, 1.11      | 4.60                     | 9.28       | 4.86                     | 8.63, 8.12, 7.68, 7.56                |

.. Variable temperature <sup>1</sup>H NMR spectroscopy of **3** and mercury(II) perchlorate at 60 °C.



| Sample $\delta_{\text{H}}$ / ppm (70 °C)                | Ar- <u>H</u> | OH   | Ar- <u>CH</u> <sub>2</sub> -Ar | <i>tert</i> -Bu | O <u>CH</u> <sub>2</sub> | N <u>H</u> | N <u>CH</u> <sub>2</sub> | Py- <u>H</u>                                           |
|---------------------------------------------------------|--------------|------|--------------------------------|-----------------|--------------------------|------------|--------------------------|--------------------------------------------------------|
| <b>3</b>                                                | 7.15, 7.09   | 8.11 | 4.25, 3.45 ( <i>J</i> 13.0)    | 1.23, 1.11      | 4.55                     | 8.89       | 4.57 ( <i>J</i> 5.9)     | 8.46, 7.71 ( <i>J</i> 7.8), 7.38 ( <i>J</i> 7.8), 7.22 |
| <b>3</b> + Hg(ClO <sub>4</sub> ) <sub>2</sub> (0.5 Eq)  | 7.15, 7.09   | 8.08 | 4.25, 3.45 ( <i>J</i> 13.0)    | 1.23, 1.11      | 4.55                     | 8.89       | 4.57 ( <i>J</i> 5.9)     | 8.47, 7.71 ( <i>J</i> 7.8), 7.39 ( <i>J</i> 7.8), 7.22 |
| <b>3</b> + Hg(ClO <sub>4</sub> ) <sub>2</sub> (1.0 Eq)  | 7.15, 7.09   | 8.08 | 4.24, 3.45 ( <i>J</i> 13.0)    | 1.23, 1.11      | 4.59                     | 8.91       | 4.55 ( <i>J</i> 5.4)     | 8.48, 7.74 (br), 7.41 (br), 7.25                       |
| <b>3</b> + Hg(ClO <sub>4</sub> ) <sub>2</sub> (1.5 Eq)  | 7.15, 7.09   | 8.07 | 4.24, 3.45 ( <i>J</i> 13.0)    | 1.23, 1.11      | 4.62                     | 8.94       | 4.56 ( <i>J</i> 5.9)     | 8.49, 7.77 ( <i>J</i> 7.8), 7.44 ( <i>J</i> 7.8), 7.28 |
| <b>3</b> + Hg(ClO <sub>4</sub> ) <sub>2</sub> (2.0 Eq)  | 7.15, 7.09   | 8.07 | 4.23, 3.45 ( <i>J</i> 13.0)    | 1.23, 1.11      | 4.63                     | 8.96       | 4.56 (br)                | 8.50, 7.78 ( <i>J</i> 7.5), 7.45 ( <i>J</i> 7.5), 7.29 |
| <b>3</b> + Hg(ClO <sub>4</sub> ) <sub>2</sub> (5.0 Eq)  | 7.15, 7.09   | 8.03 | 4.22, 3.45 ( <i>J</i> 12.9)    | 1.23, 1.11      | 4.70                     | 9.04       | 4.57 (br)                | 8.54, 7.86 (br), 7.53 (br), 7.38                       |
| <b>3</b> + Hg(ClO <sub>4</sub> ) <sub>2</sub> (10.0 Eq) | 7.14, 7.08   | 7.98 | 4.20, 3.45 ( <i>J</i> 12.9)    | 1.22, 1.10      | 4.78                     | 9.14       | 4.58 (br)                | 8.59, 7.94 (br), 7.60 ( <i>J</i> 7.5), 7.47            |
| <b>3</b> + Hg(ClO <sub>4</sub> ) <sub>2</sub> (15.0 Eq) | 7.14, 7.08   | 7.98 | 4.19, 3.45 ( <i>J</i> 12.9)    | 1.22, 1.10      | 4.81                     | 9.17       | 4.59 (br)                | 8.60, 7.97 (br), 7.63 ( <i>br</i> ), 7.50              |

– Variable temperature <sup>1</sup>H NMR spectroscopy of **3** and mercury(II) perchlorate at 70 °C.

| Sample $\delta_{\text{H}}$ / ppm (80 °C)                | Ar- <u>H</u> | OH   | Ar- <u>CH</u> <sub>2</sub> -Ar | <i>tert</i> -Bu | O <u>CH</u> <sub>2</sub> | N <u>H</u> | N <u>CH</u> <sub>2</sub> | Py- <u>H</u>                                                           |
|---------------------------------------------------------|--------------|------|--------------------------------|-----------------|--------------------------|------------|--------------------------|------------------------------------------------------------------------|
| <b>3</b>                                                | 7.14, 7.07   | 7.99 | 4.25, 3.44 ( <i>J</i> 13.0)    | 1.24, 1.10      | 4.55                     | 8.84       | 4.57 ( <i>J</i> 5.9)     | 8.46 ( <i>J</i> 4.7), 7.70 ( <i>J</i> 7.7), 7.38 ( <i>J</i> 7.7), 7.21 |
| <b>3</b> + Hg(ClO <sub>4</sub> ) <sub>2</sub> (0.5 Eq)  | 7.14, 7.07   | 7.98 | 4.25, 3.44 ( <i>J</i> 13.0)    | 1.24, 1.10      | 4.55                     | 8.84       | 4.57 ( <i>J</i> 5.8)     | 8.46 (br), 7.70 ( <i>J</i> 7.8), 7.39 ( <i>J</i> 7.8), 7.22            |
| <b>3</b> + Hg(ClO <sub>4</sub> ) <sub>2</sub> (1.0 Eq)  | 7.14, 7.06   | 7.95 | 4.25, 3.44 ( <i>J</i> 13.0)    | 1.24, 1.10      | 4.55                     | 8.85       | 4.59 ( <i>J</i> 5.9)     | 8.48 (br), 7.73 ( <i>J</i> 7.8), 7.41 ( <i>J</i> 7.8), 7.24            |
| <b>3</b> + Hg(ClO <sub>4</sub> ) <sub>2</sub> (1.5 Eq)  | 7.14, 7.06   | 7.94 | 4.24, 3.44 ( <i>J</i> 13.0)    | 1.24, 1.09      | 4.55                     | 8.87       | 4.60 ( <i>J</i> 5.7)     | 8.48 (br), 7.74 ( <i>J</i> 7.7), 7.42 ( <i>J</i> 7.7), 7.26            |
| <b>3</b> + Hg(ClO <sub>4</sub> ) <sub>2</sub> (2.0 Eq)  | 7.14, 7.06   | 7.94 | 4.23, 3.44 ( <i>J</i> 13.0)    | 1.24, 1.09      | 4.56                     | 8.89       | 4.62 ( <i>J</i> 5.6)     | 8.49 (br), 7.75 ( <i>J</i> 7.7), 7.43 ( <i>J</i> 7.7), 7.27            |
| <b>3</b> + Hg(ClO <sub>4</sub> ) <sub>2</sub> (5.0 Eq)  | 7.15, 7.09   | 7.92 | 4.22, 3.45 ( <i>J</i> 12.9)    | 1.23, 1.11      | 4.57                     | 8.96       | 4.67 (br)                | 8.52 (br), 7.82 (br), 7.49 (br), 7.34                                  |
| <b>3</b> + Hg(ClO <sub>4</sub> ) <sub>2</sub> (10.0 Eq) | 7.14, 7.06   | 7.88 | 4.21, 3.44 ( <i>J</i> 12.9)    | 1.24, 1.08      | 4.57                     | 9.04       | 4.74 ( <i>J</i> 4.9)     | 8.56 (br), 7.90 (br), 7.56 ( <i>J</i> 7.7), 7.41                       |
| <b>3</b> + Hg(ClO <sub>4</sub> ) <sub>2</sub> (15.0 Eq) | 7.14, 7.06   | 7.86 | 4.20, 3.44 ( <i>J</i> 13.0)    | 1.24, 1.09      | 4.58                     | 9.08       | 4.77 (br)                | 8.58 (br), 7.92 (br), 7.59 (br), 7.45                                  |

– Variable temperature <sup>1</sup>H NMR spectroscopy of **3** and mercury(II) perchlorate at 80 °C.

| Sample $\delta_{\text{H}}$ / ppm (90 °C)                | Ar- <u>H</u> | OH   | Ar- <u>CH</u> <sub>2</sub> -Ar | <i>tert</i> -Bu | O <u>CH</u> <sub>2</sub> | N <u>H</u> | N <u>CH</u> <sub>2</sub> | Py- <u>H</u>                                                           |
|---------------------------------------------------------|--------------|------|--------------------------------|-----------------|--------------------------|------------|--------------------------|------------------------------------------------------------------------|
| <b>3</b>                                                | 7.14, 7.05   | 7.89 | 4.26, 3.43 ( <i>J</i> 13.0)    | 1.25, 1.09      | 4.55                     | 8.80       | 4.57 ( <i>J</i> 5.6)     | 8.46 ( <i>J</i> 4.4), 7.70 ( <i>J</i> 7.6), 7.39 ( <i>J</i> 7.6), 7.21 |
| <b>3</b> + Hg(ClO <sub>4</sub> ) <sub>2</sub> (0.5 Eq)  | 7.14, 7.04   | 7.85 | 4.25, 3.43 ( <i>J</i> 13.0)    | 1.25, 1.08      | 4.55                     | 8.79       | 4.57 ( <i>J</i> 5.6)     | 8.46 ( <i>J</i> 4.4), 7.70 ( <i>J</i> 7.7), 7.38 ( <i>J</i> 7.7), 7.21 |
| <b>3</b> + Hg(ClO <sub>4</sub> ) <sub>2</sub> (1.0 Eq)  | 7.14, 7.03   | 7.81 | 4.25, 3.43 ( <i>J</i> 13.0)    | 1.25, 1.08      | 4.55                     | 8.79       | 4.59 ( <i>J</i> 5.3)     | 8.47 (br), 7.71 ( <i>J</i> 7.7), 7.40 ( <i>J</i> 7.7), 7.22            |
| <b>3</b> + Hg(ClO <sub>4</sub> ) <sub>2</sub> (1.5 Eq)  | 7.14, 7.03   | 7.81 | 4.25, 3.43 ( <i>J</i> 13.0)    | 1.25, 1.08      | 4.55                     | 8.81       | 4.60 ( <i>J</i> 5.6)     | 8.48 (br), 7.73 ( <i>J</i> 7.7), 7.41 ( <i>J</i> 7.7), 7.24            |
| <b>3</b> + Hg(ClO <sub>4</sub> ) <sub>2</sub> (2.0 Eq)  | 7.14, 7.03   | 7.81 | 4.25, 3.43 ( <i>J</i> 13.0)    | 1.25, 1.08      | 4.55                     | 8.82       | 4.61 (br)                | 8.48 (br), 7.74 ( <i>J</i> 7.5), 7.42 ( <i>J</i> 7.5), 7.25            |
| <b>3</b> + Hg(ClO <sub>4</sub> ) <sub>2</sub> (5.0 Eq)  | 7.14, 7.03   | 7.79 | 4.23, 3.43 ( <i>J</i> 12.8)    | 1.25, 1.08      | 4.56                     | 8.88       | 4.65 (br)                | 8.51 (br), 7.79 (br), 7.47 (br), 7.31                                  |
| <b>3</b> + Hg(ClO <sub>4</sub> ) <sub>2</sub> (10.0 Eq) | 7.13, 7.03   | 7.76 | 4.22, 3.43 ( <i>J</i> 12.9)    | 1.25, 1.07      | 4.57                     | 8.94       | 4.70 (br)                | 8.55 (br), 7.85 (br), 7.53 ( <i>J</i> 7.5), 7.37                       |
| <b>3</b> + Hg(ClO <sub>4</sub> ) <sub>2</sub> (15.0 Eq) | 7.14, 7.08   | 7.76 | 4.21, 3.43 ( <i>J</i> 12.9)    | 1.24, 1.07      | 4.58                     | 8.99       | 4.73 (br)                | 8.56 (br), 7.88 (br), 7.55 (br), 7.41                                  |

– Variable temperature <sup>1</sup>H NMR spectroscopy of **3** and mercury(II) perchlorate at 90 °C.
